# Supplementary material for: Tunable insulator–metal transition in epitaxial VO2 thin films via strain and defect engineering
Source: Royal Society of Chemistry journal article supplement (doi:10.1039/d4na00682h), 2024-01-01
Supplement: d4na00682h1.pdf [file d4na00682h1.pdf]

## Tunable Insulator-Metal transition in Epitaxial VO<sub>2</sub> thin film *via* strain and defect engineering

**Aditya Kamat**<sup>1</sup>, Gurukrishna K<sup>1</sup>., Rishow Kumar<sup>1</sup>, Abhishek Mishra<sup>2</sup>, Amit Kumar Verma<sup>2</sup>, Shivam Tripathi<sup>1</sup>, Ashish Garg<sup>3</sup>, Shikhar Misra<sup>1\*</sup>

<sup>1</sup>*Department of Materials Science and Engineering, Indian Institute of Technology Kanpur, Kalyanpur, Kanpur, India 208016*

<sup>2</sup>*Department of Electrical Engineering, Indian Institute of Technology Kanpur, Kalyanpur, Kanpur, India 208016*

<sup>3</sup>*Department of Sustainable Energy Engineering, Indian Institute of Technology Kanpur, Kalyanpur, Kanpur, India 208016*

\*Corresponding Author E-mail: [shikharm@iitk.ac.in](mailto:shikharm@iitk.ac.in)

Exposure of (110) plane with respect to (020) out of plane, as shown in Figure S1(a) shows a much better response to X-Ray Diffraction compared to S1(b), which accounts for Phi scan of (110) plane with respect to (002) out of plane.

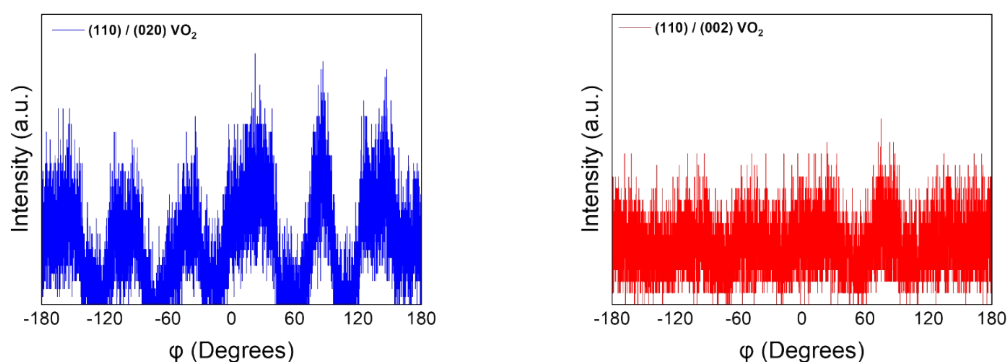

Figure S1 – The Phi scan results of the (110) plane of VO<sub>2</sub>, assuming (020) as out of plane orientation in (a), and (002) out-of-plane orientation in (b). The results confirm the (020) out-of-plane orientation, as the (a) is of much better quality

A shift to higher wavelengths signifies lower band gap, the metallic rutile phase being more stable. This correlates well with the XRD results showing more compressive strain along the b-axis present in the film grown at 550°C. The R-T analysis showed the  $T_c$  for the VO<sub>2</sub> film grown at 500°C to be 65°C (lowest among all the VO<sub>2</sub> films grown in this study), agreeing with the Reflectivity analysis presented in this article. The direct band gap for the three samples were obtained using the Kubelka–Munk model.  $[F(R)hv]^2$  was plotted on the x-axis, and the intercept of the tangent to the plot on this axis was considered as the direct band gap of the sample, where  $F(R) = (1 - R)^2/2R$  and  $hv$  is the photon energy.<sup>1</sup>

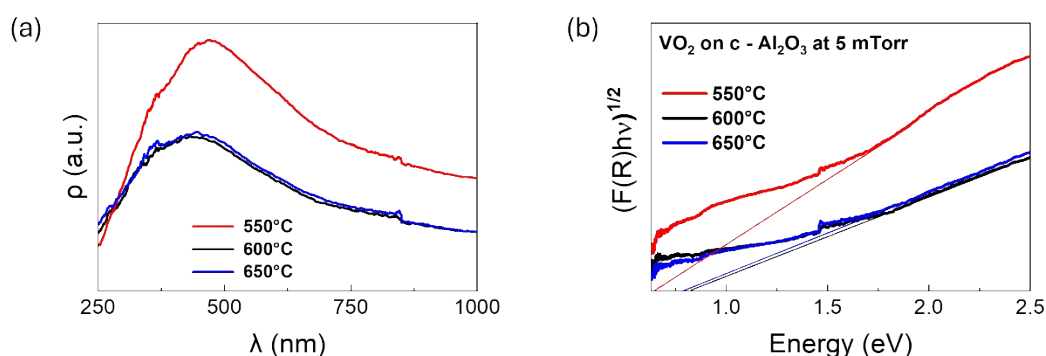

Figure S2 – UV-Vis-Spectroscopy plots for the three VO<sub>2</sub> films grown on (0001) sapphire at 5 mTorr oxygen pressure, with varying substrate deposition temperature (a) is the reflectance plot, while its derivation obtained using the Kubelka-Munk model is shown in (b)

## References

- 1 K. Brajesh, S. Ranjan, R. Kumar, R. Gupta, A. Dixit and A. Garg, *Journal of the American Ceramic Society*, 2023, **106**, 6769–6777.
